# Supplementary material for: Small-scale disturbances in the stratigraphy of the NEEM ice core: observations and numerical model simulations
Source: Copernicus journal article supplement (doi:10.5194/tc-10-359-2016), 2016-02-12
Supplement: Supplementary file 1 [file tc-10-359-2016-supplement.pdf]

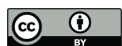

## *Supplement of*

# **Small-scale disturbances in the stratigraphy of the NEEM ice core: observations and numerical model simulations**

**D. Jansen et al.**

*Correspondence to:* D. Jansen ([daniela.jansen@awi.de](mailto:daniela.jansen@awi.de))

The copyright of individual parts of the supplement might differ from the CC-BY 3.0 licence.

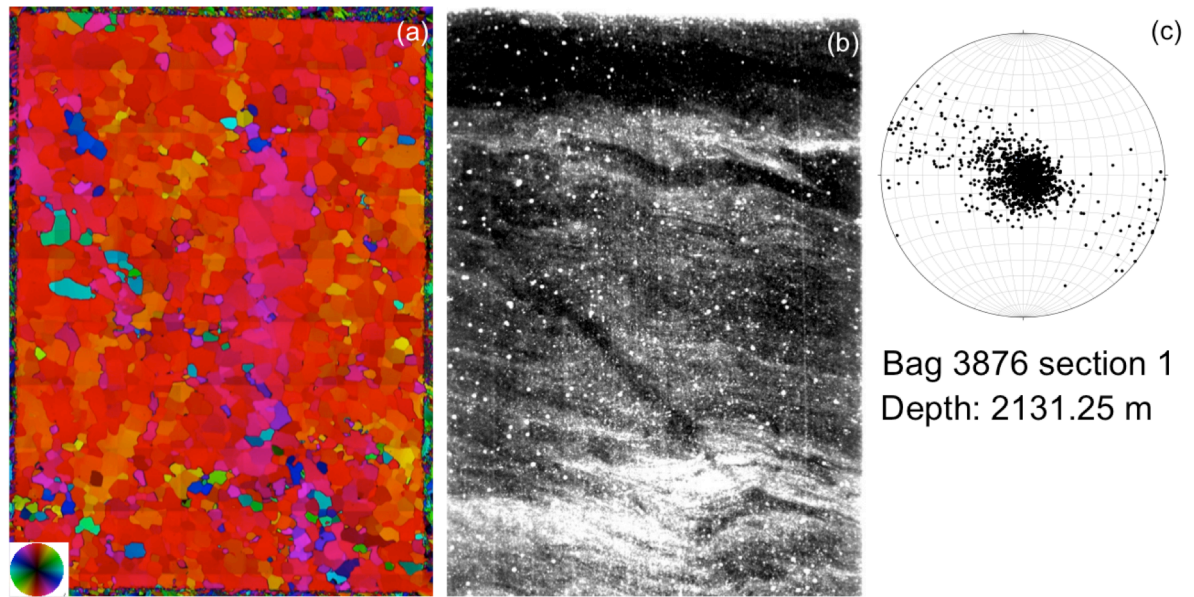

**Figure S1:** Comparison fabric data and visual stratigraphy in detail, Bag 3876, approximate depth 2131.25 m. (a) fabric data, (b) linescan image, (c) stereoplot of c-axis orientations.

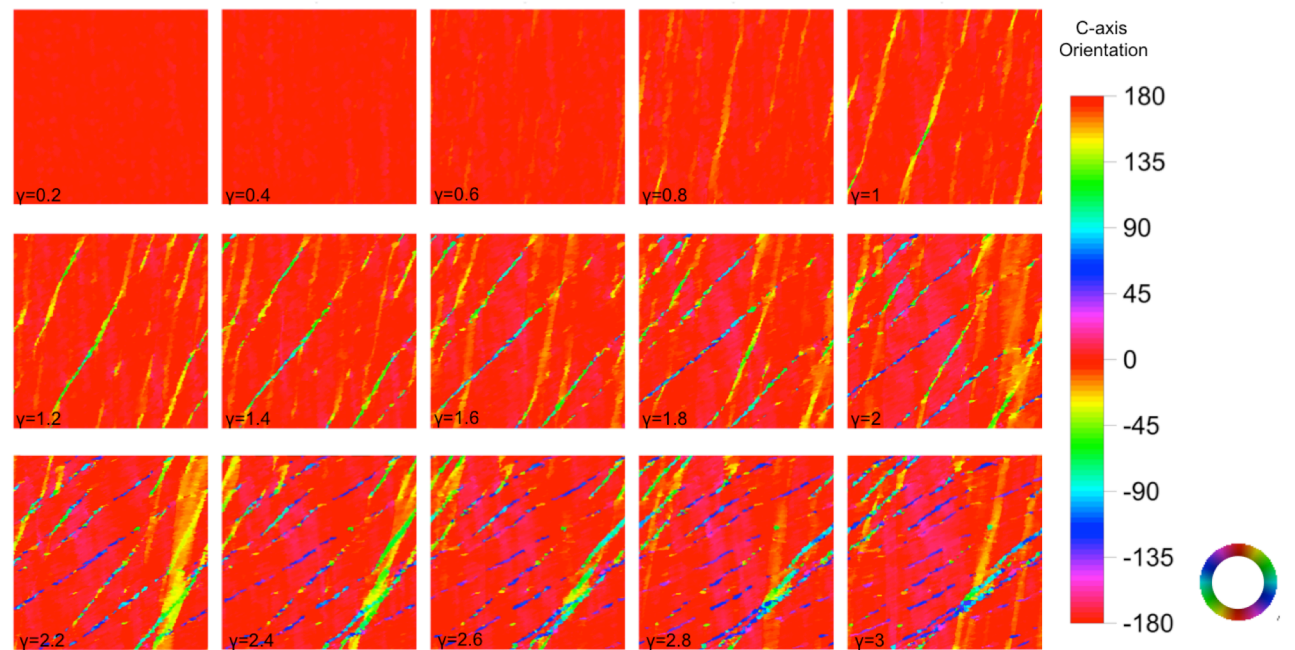

**Figure S2:** ELLE model results for the simple shear experiment for steps of  $\gamma=0.2$ .

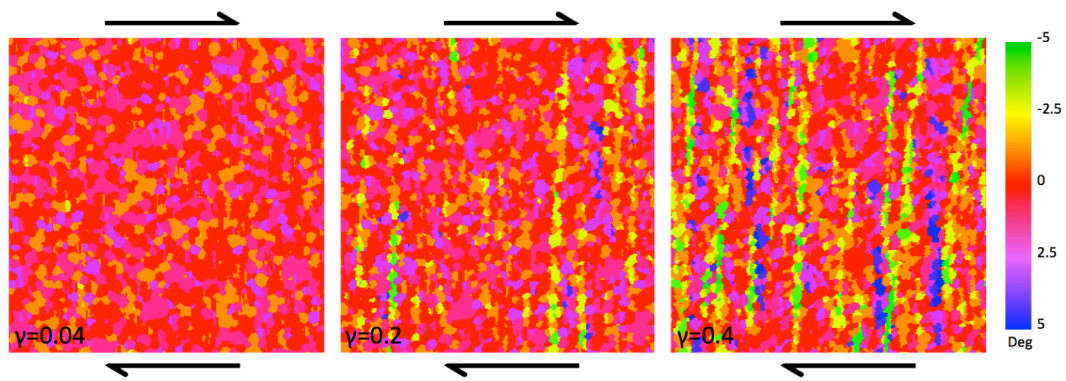

**Figure S3:** (a) Configuration of c-axes orientation for ELLE simulation after first deformation step. The color indicates the deviation from the vertical. Negative values indicate clockwise rotation. (b, c) C-axes orientations after  $\gamma=0.2$  and  $\gamma=0.4$

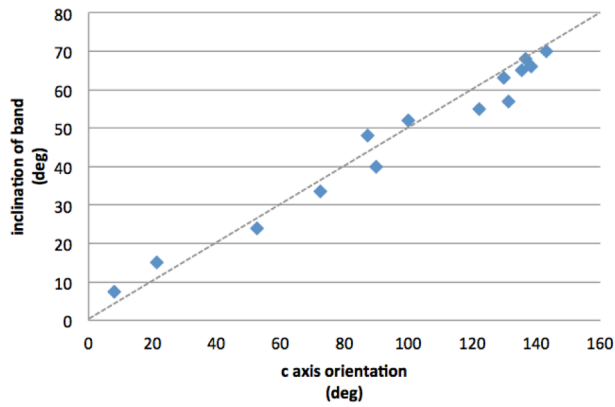

**Figure S4:** Relation between inclination of the bands and c-axes orientation derived from ELLE simulations. The dashed grey line indicates a slope of 0.5.
